# Supplementary material for: Postoperative short-term mortality between insulin-treated and non-insulin-treated patients with diabetes after non-cardiac surgery: a systematic review and meta-analysis
Source: Frontiers journal article supplement (doi:10.3389/fmed.2023.1142490), 2023-05-02

Supplemental Digital Content 4

Postoperative short-term mortality between insulin-treated and non-insulin-treated patients with diabetes after non-cardiac surgery: a systematic review and meta-analysis

## Figure 1. Sensitivity analysis


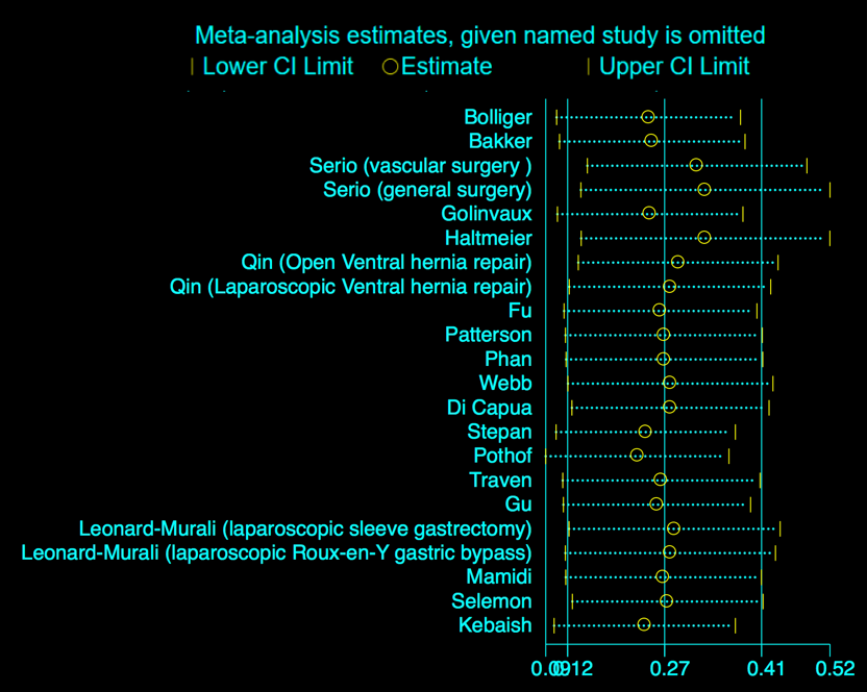

Supplement: Data_Sheet_1.zip [file Data_Sheet_1.zip]
